# Supplementary material for: Structure‐energy‐based predictions and network modelling of RASopathy and cancer missense mutations
Source: PubMed Central journal article supplement (PMC4188041; doi:10.1002/msb.20145092), 2014-05-06
Supplement: MSB-10-5-727-s3.pdf [file MSB-10-5-727-s3.pdf]

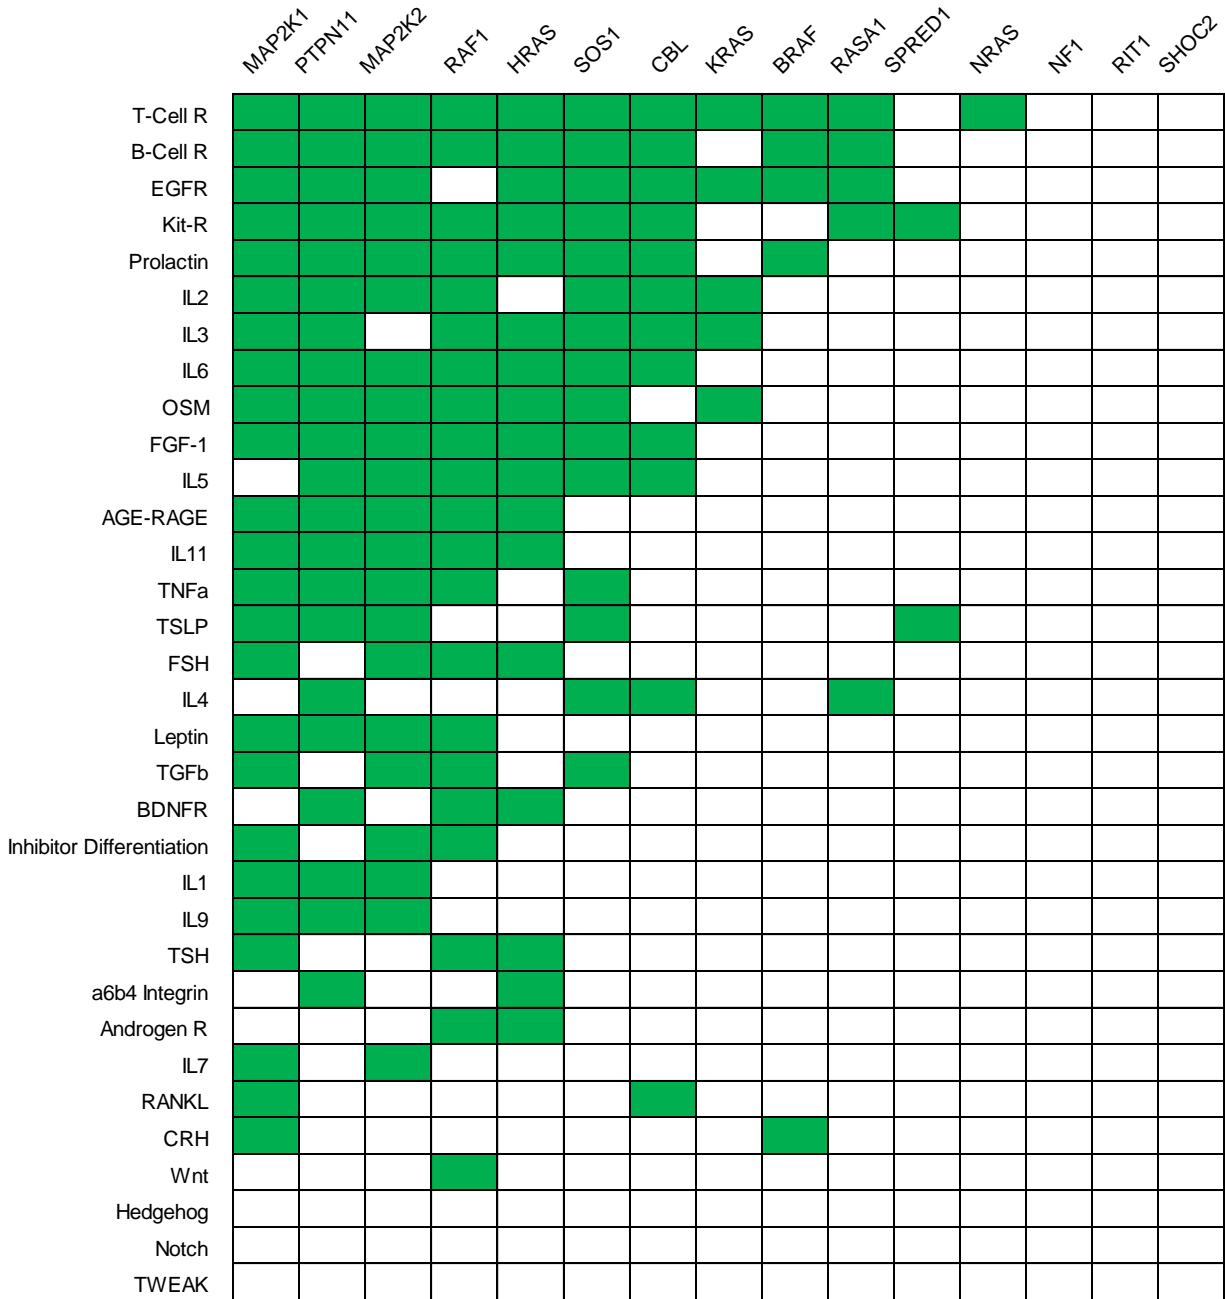

■ Involved in pathway  
 □ Not involved in pathway

**Supplementary Figure S3.** Details of the participation of the 15 RASopathy proteins in 33 signaling pathways from NetPath. Proteins are sorted from left to right according to the total number of pathways they participate in. Pathways are sorted from the top to the bottom according to the number of the 15 RASopathy proteins involved.
