# Supplementary material for: Structure‐energy‐based predictions and network modelling of RASopathy and cancer missense mutations
Source: PubMed Central journal article supplement (PMC4188041; doi:10.1002/msb.20145092), 2014-05-06
Supplement: MSB-10-5-727-s4.pdf [file MSB-10-5-727-s4.pdf]

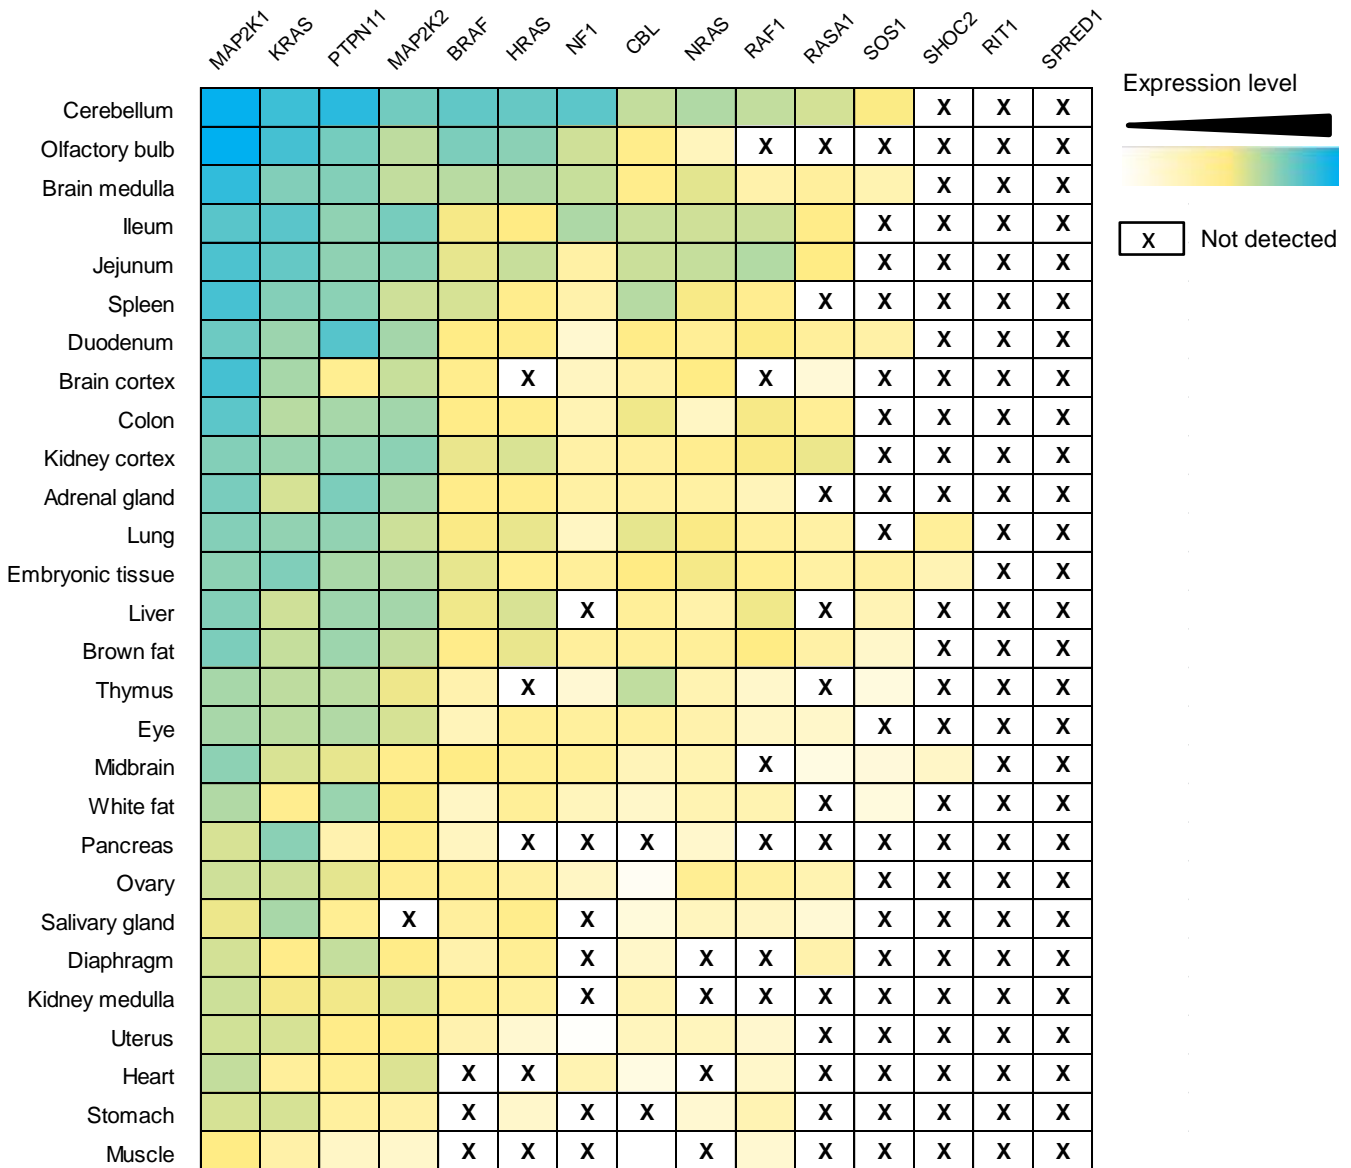

**Supplementary Figure S4.** Protein expression levels in 28 tissues for the 15 RASopathy genes. Expression levels (based on Geiger et al, *Mol Cell Proteomics*, Jun;12(6):1709-22, 2013) are colored from yellow to blue with increasing value. Black crosses indicate no detection of the respective protein.
