# Supplementary material for: Structure‐energy‐based predictions and network modelling of RASopathy and cancer missense mutations
Source: PubMed Central journal article supplement (PMC4188041; doi:10.1002/msb.20145092), 2014-05-06
Supplement: MSB-10-5-727-s5.pdf [file MSB-10-5-727-s5.pdf]

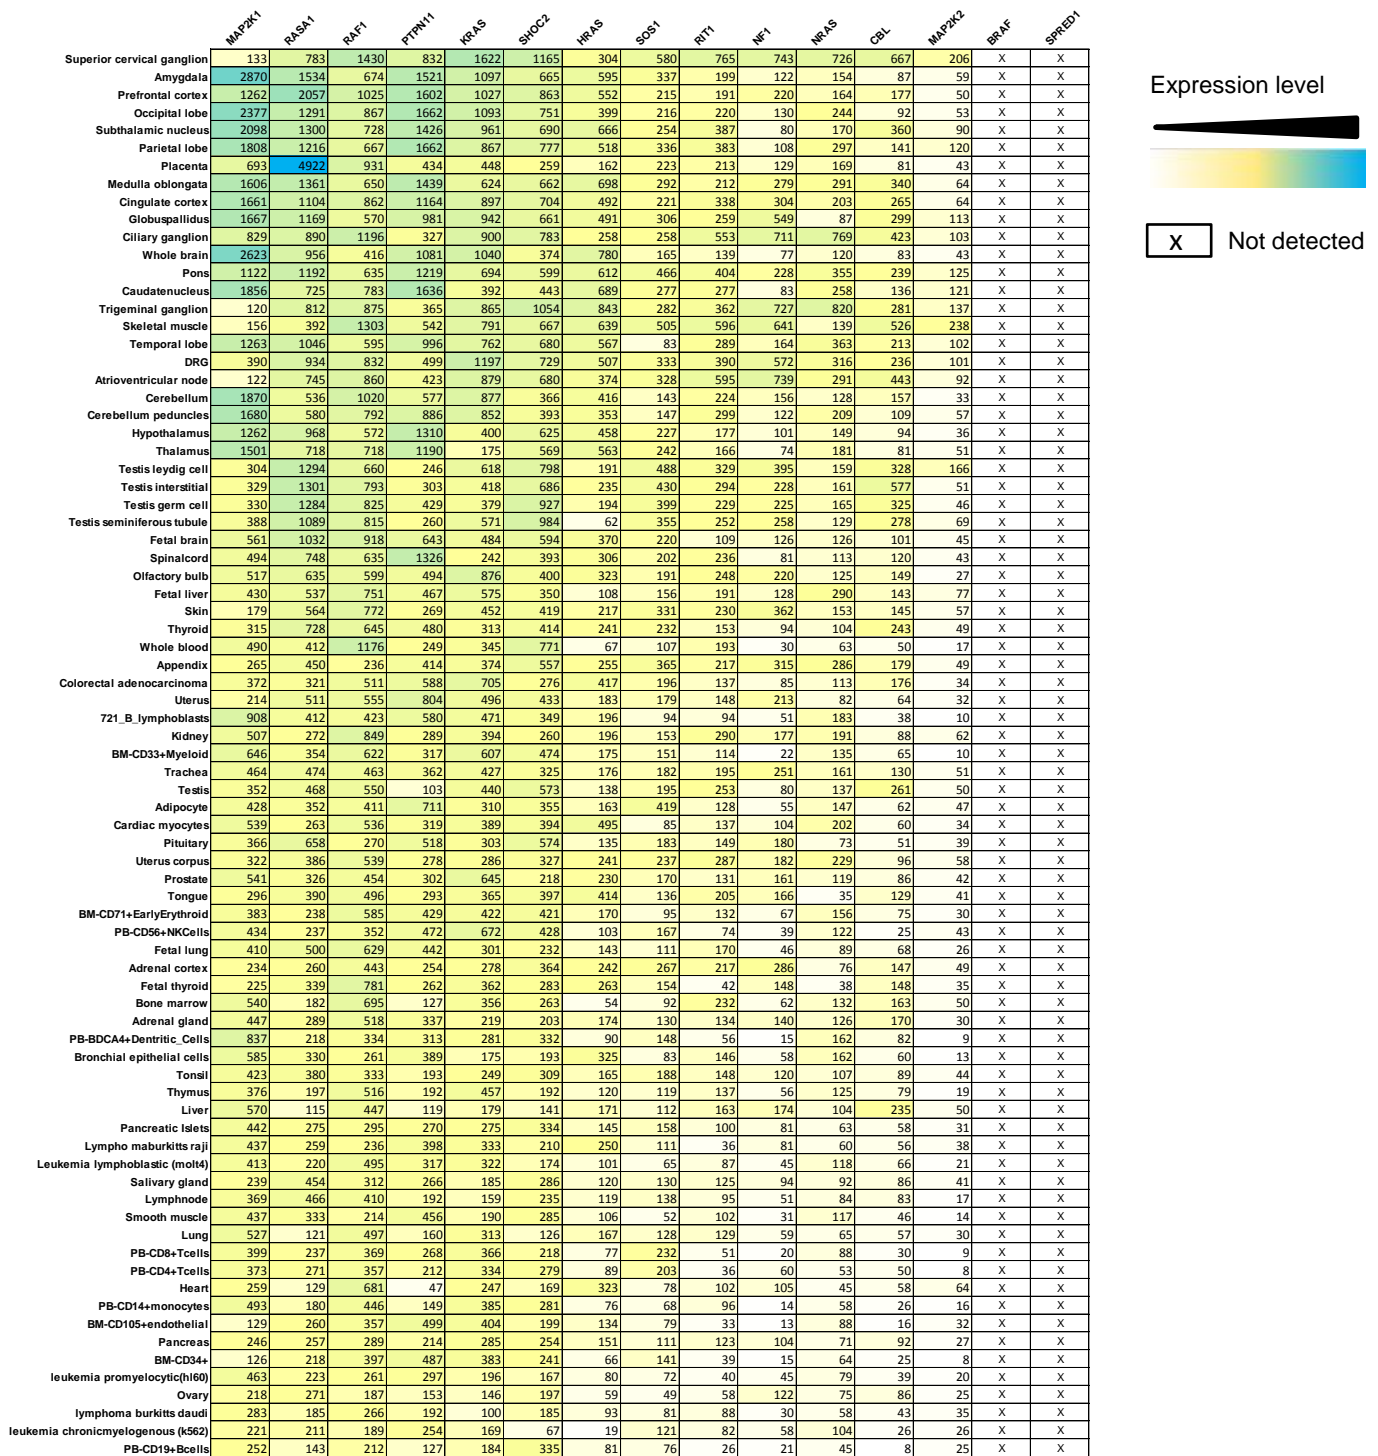

Expression level

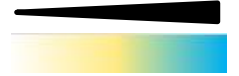

X Not detected

**Supplementary Figure S5.** Transcript expression levels in 79 tissues for the 15 RASopathy genes. Expression levels (based on Su et al, Proc Natl Acad Sci U S A. Apr 2;99(7):4465-702002) are colored from yellow to blue with increasing value. Black crosses indicate no detection of the transcript.
