# Supplementary material for: Structure‐energy‐based predictions and network modelling of RASopathy and cancer missense mutations
Source: PubMed Central journal article supplement (PMC4188041; doi:10.1002/msb.20145092), 2014-05-06
Supplement: MSB-10-5-727-s6.pdf [file MSB-10-5-727-s6.pdf]

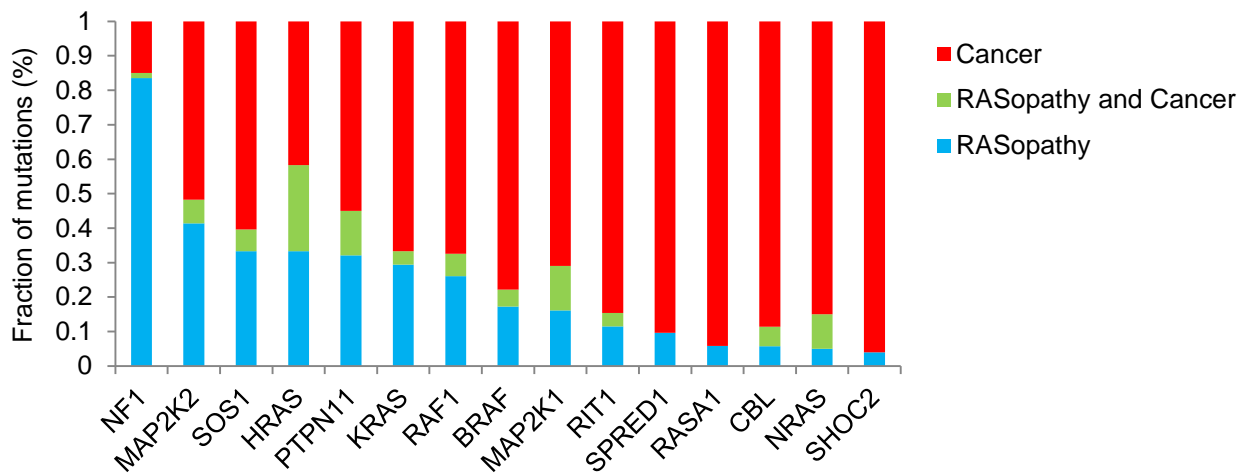

**Supplementary Figure S6.** Fraction of different RASopathy and cancer mutations in each of the 15 genes.
