# Supplementary material for: Structure‐energy‐based predictions and network modelling of RASopathy and cancer missense mutations
Source: PubMed Central journal article supplement (PMC4188041; doi:10.1002/msb.20145092), 2014-05-06
Supplement: MSB-10-5-727-s7.pdf [file MSB-10-5-727-s7.pdf]

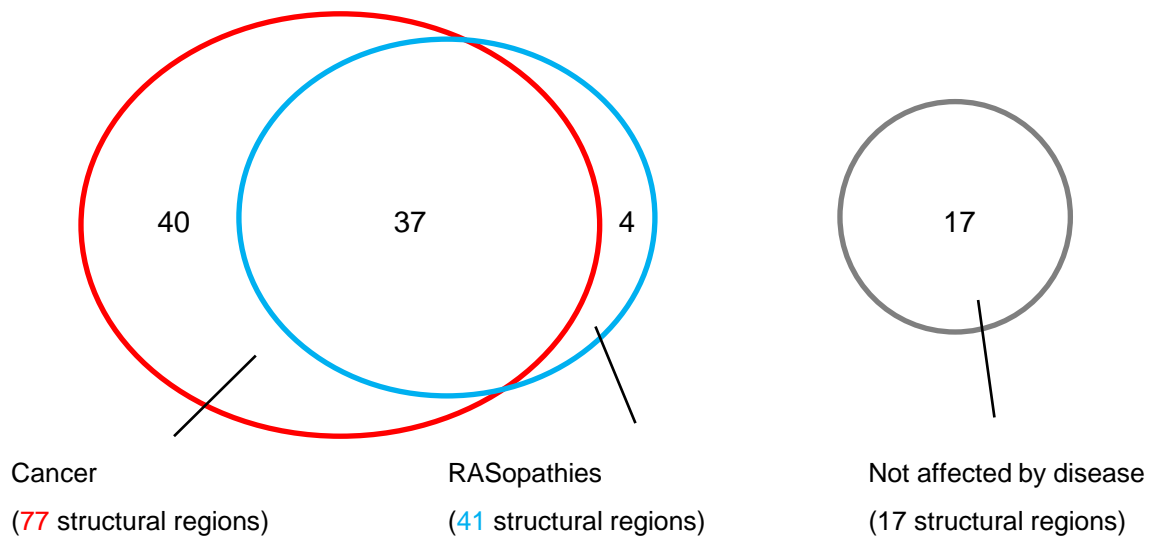

**Supplementary Figure S7.** Summary of the distribution of somatic and germline mutations in 98 different structural domains and inter-structural regions. Summary of the co-occurrence of germline and RASopathy mutations in different structural regions as shown in Figure 2.
