# Supplementary material for: Structure‐energy‐based predictions and network modelling of RASopathy and cancer missense mutations
Source: PubMed Central journal article supplement (PMC4188041; doi:10.1002/msb.20145092), 2014-05-06
Supplement: MSB-10-5-727-s8.pdf [file MSB-10-5-727-s8.pdf]

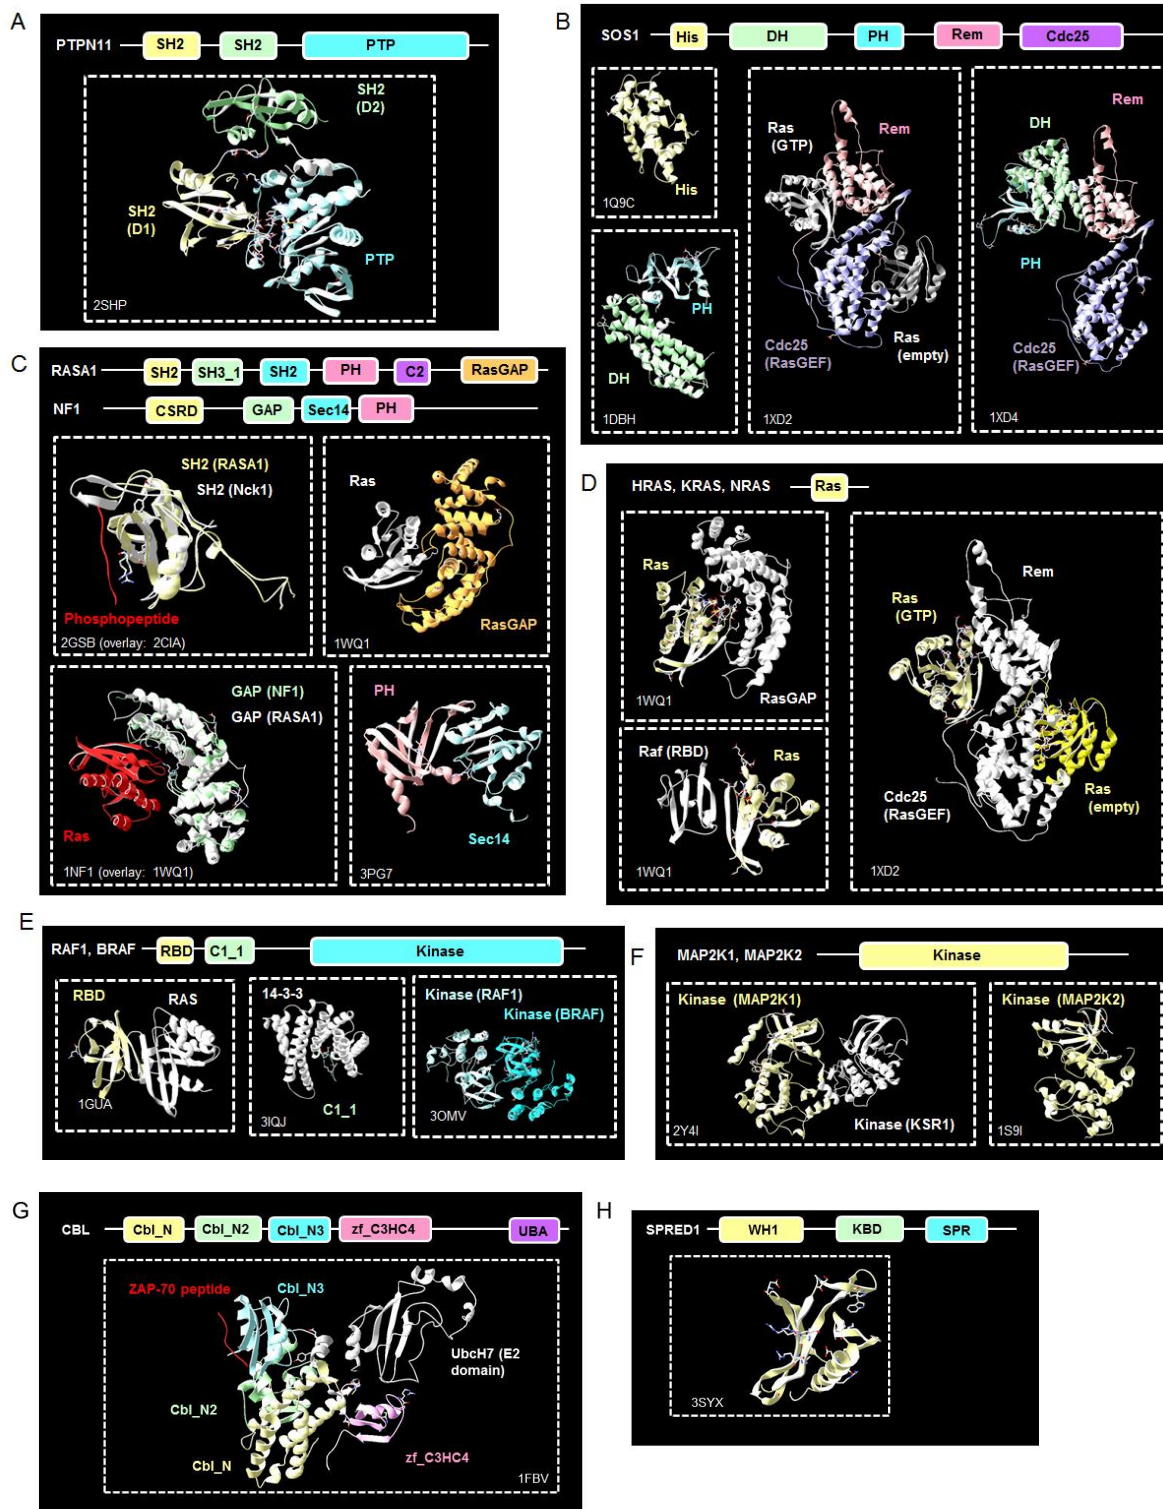

**Supplementary Figure S8.** Domain representation and structural coverage for the RASopathy-associated proteins. **(A)** Available 3D structures for PTPN11. **(B)** Available 3D structures for SOS1. **(C)** Available 3D structures for RASA1 and NF1. **(D)** Available 3D structures for HRAS, KRAS, and NRAS. **(E)** Available 3D structures for RAF1 and BRAF. **(F)** Available 3D structures for MAPK1 and MAPK2. **(G)** Available 3D structure for CBL. **(H)** Available 3D structure for SPRED1.
