# Supplementary material for: Structure‐energy‐based predictions and network modelling of RASopathy and cancer missense mutations
Source: PubMed Central journal article supplement (PMC4188041; doi:10.1002/msb.20145092), 2014-05-06
Supplement: MSB-10-5-727-s9.pdf [file MSB-10-5-727-s9.pdf]

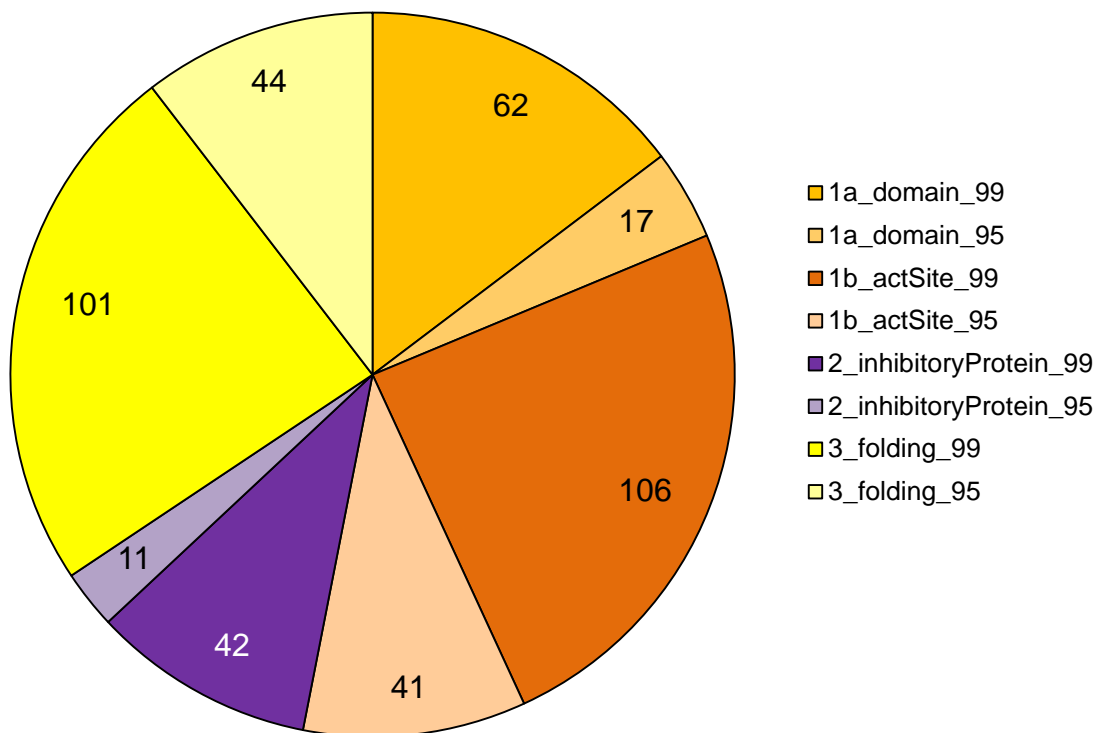

**Supplementary Figure S9.** Distribution of 424 missense mutations that map to a 3D structure into different classes with the two FoldX thresholds separately represented. The results of FoldX predictions are shown for 99% confidence predictions (2 STDEV =1.6 kcal/mol, and for 95% confidence predictions (1 STDEV = 0.8 kcal/mol). The different groups (1a\_domain, 1b\_actSite, 2\_inhibitoryProtein, and 3\_folding) follow the classification as shown in main figure 3. The label '99' and '95' indicate the different confidence thresholds of FoldX energies.
