# Supplementary material for: Structure‐energy‐based predictions and network modelling of RASopathy and cancer missense mutations
Source: PubMed Central journal article supplement (PMC4188041; doi:10.1002/msb.20145092), 2014-05-06
Supplement: MSB-10-5-727-s10.pdf [file MSB-10-5-727-s10.pdf]

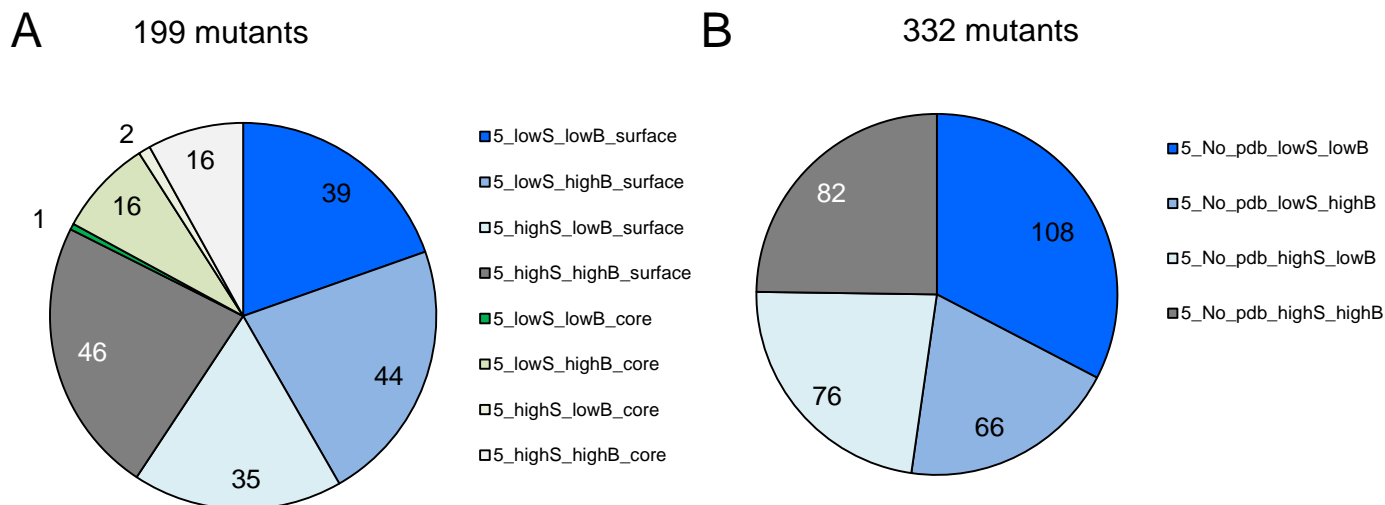

**Supplementary Figure S10.** Sequence-based classification for 199 non-destabilizing mutants and 332 mutations that could not be modeled on a three-dimensional structure. **(A)** Classification for non-destabilizing mutants. **(B)** Classification for mutations with no three-dimensional structural template. Abbreviation: S; Shannon entropy, B; Blosum matrix change, surface; mutations localized on the surface of the three-dimensional structure; mutations localized on the surface of the three-dimensional structure
