# Supplementary material for: Structure‐energy‐based predictions and network modelling of RASopathy and cancer missense mutations
Source: PubMed Central journal article supplement (PMC4188041; doi:10.1002/msb.20145092), 2014-05-06
Supplement: MSB-10-5-727-s11.pdf [file MSB-10-5-727-s11.pdf]

**A**

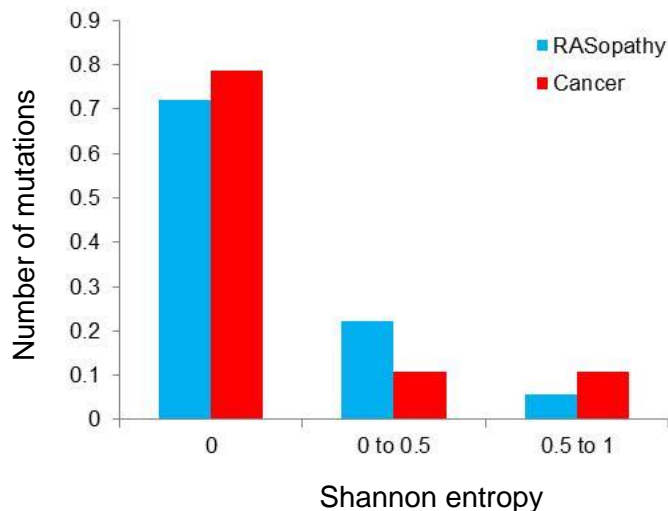

**B**

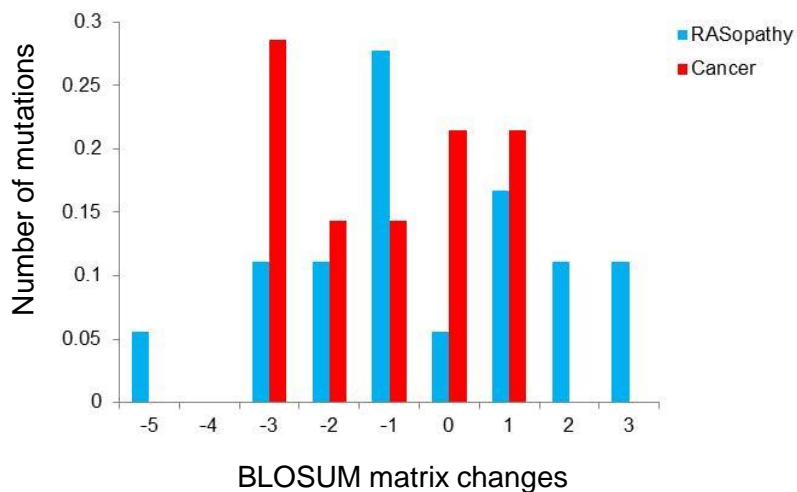

**Supplementary Figure S11.** Sequence-based analysis of a gold set of RASopathy and cancer missense mutations. **(A)** Shannon entropy values for amino acid positions. Higher values indicate less evolutionary conserved amino acid positions. **(B)** BLOSUM matrix changes for amino acid substitutions. Higher values indicate substitution with higher similar physiochemical properties of amino acids.
