# Supplementary material for: Structure‐energy‐based predictions and network modelling of RASopathy and cancer missense mutations
Source: PubMed Central journal article supplement (PMC4188041; doi:10.1002/msb.20145092), 2014-05-06
Supplement: MSB-10-5-727-s12.pdf [file MSB-10-5-727-s12.pdf]

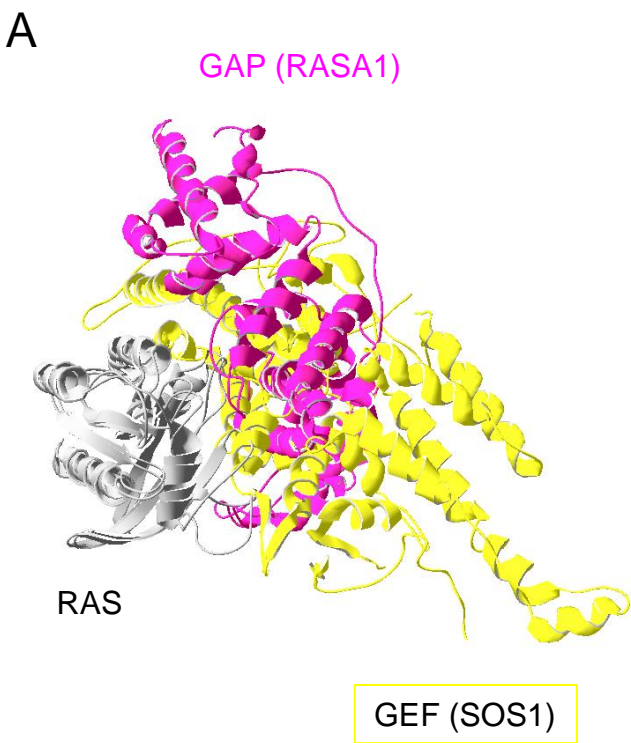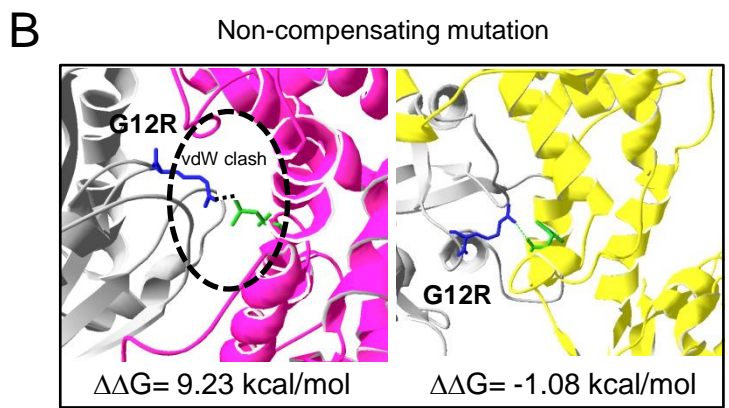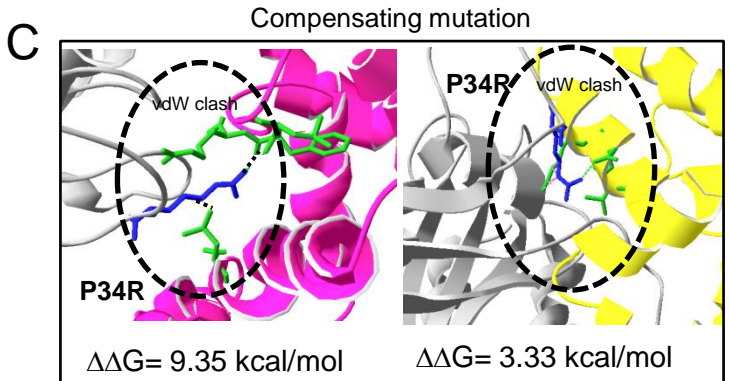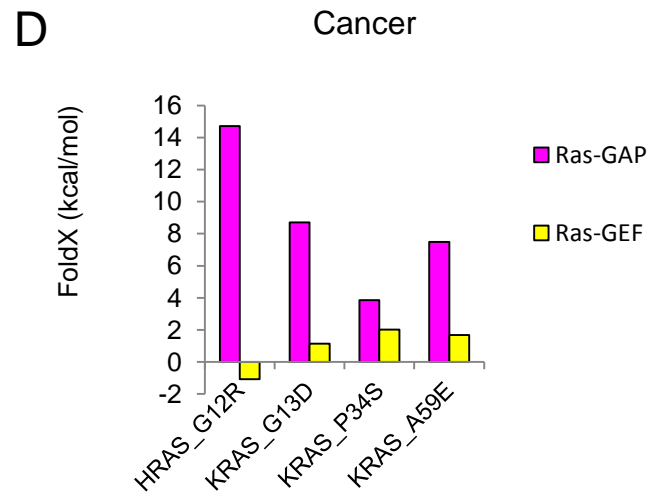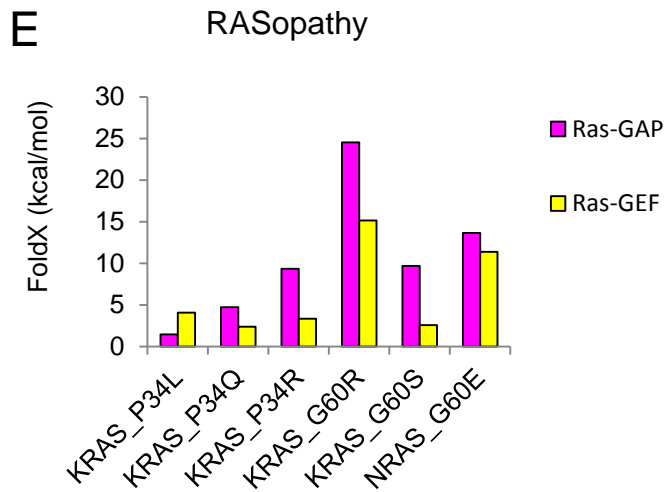

**Supplementary Figure S12.** FoldX-predicted compensatory mutations in Ras for binding to GEF and GAP. **(A)** Overlay of Ras in complex with a GEF (SOS1) and a GAP (RASA1). **(B)** Structural details for the RasG12R mutation as an example for a non-compensating mutation. Amino acid residues in Ras are shown in blue and neighbouring residues (<3 Å) of RASA1 and SOS1 in green. **(C)** Structural details for the RasP34R mutation as an example for a compensating mutation. Amino acid residues of Ras are shown in blue and neighbouring residues (<3 Å) in RASA1 and SOS1 in green. **(D)** FoldX energies for Ras cancer mutations modelled in complex with GAP (pdb entry: 1WGR) GEF (pdb entry: 1XD2, molecules B and C). **(E)** FoldX energies for Ras RASopathy mutations modelled in complex with GAP (pdb entry: 1WGR) GEF (pdb entry: 1XD2, molecules B and C).
