# Supplementary material for: Structure‐energy‐based predictions and network modelling of RASopathy and cancer missense mutations
Source: PubMed Central journal article supplement (PMC4188041; doi:10.1002/msb.20145092), 2014-05-06
Supplement: MSB-10-5-727-s15.pdf [file MSB-10-5-727-s15.pdf]

| Reaction Nr | Reaction              | Rate [s-1] 1 <sup>st</sup> order<br>Rate [M-1 s-1] 2 <sup>nd</sup> order | Reverse rate [s-1]     |
|-------------|-----------------------|--------------------------------------------------------------------------|------------------------|
| 1           | RasD → RasT           | Rate 1 (see table S4)                                                    |                        |
| 2           | RasT → RasD           | Rate 2 (see table S4)                                                    |                        |
| 3           | RasD + GEF ↔ RasD_GEF | 1.5e7                                                                    | 0.13                   |
| 4           | RasD_GEF → GEF + RasT | Rate 4 (see table S4)                                                    |                        |
| 5           | RasT + GAP ↔ RasT_GAP | 3e7                                                                      | 1                      |
| 6           | RasT_GAP → RasD + GAP | Rate 6 (see table S4)                                                    |                        |
| 7           | RasT + EFF ↔ RasT_EFF | 2.9e6                                                                    | Rate 7b (see table S4) |

**Supplementary Table S3.** Reactions of the network model to simulate Ras WT and missense mutations.
