# Supplementary material for: Structure‐energy‐based predictions and network modelling of RASopathy and cancer missense mutations
Source: PubMed Central journal article supplement (PMC4188041; doi:10.1002/msb.20145092), 2014-05-06
Supplement: MSB-10-5-727-s16.pdf [file MSB-10-5-727-s16.pdf]

|       | Rate 1 [s <sup>-1</sup> ] | Rate 2 [s <sup>-1</sup> ] | Rate 4 [s <sup>-1</sup> ] | Rate 6 [s <sup>-1</sup> ] | Rate 7b [s <sup>-1</sup> ] |
|-------|---------------------------|---------------------------|---------------------------|---------------------------|----------------------------|
| WT    | 3.00E-05                  | 9.300E-03                 | 0.30                      | 7.76                      | 5.22                       |
| G12V  | 2.00E-05                  | 1.500E-03                 | 0.17                      | 0.00                      | 28.00                      |
| K5N   | 4.00E-05                  | 9.400E-03                 | 0.37                      | 8.59                      | 3.80                       |
| V14I  | 8.90E-04                  | 1.000E-02                 | 5.90                      | 9.01                      | 32.27                      |
| Q22E  | 7.80E-04                  | 1.030E-02                 | 7.00                      | 0.25                      | 33.46                      |
| Q22R  | 4.00E-05                  | 6.400E-03                 | 0.67                      | 0.33                      | 12.10                      |
| P34L  | 8.00E-05                  | 9.200E-03                 | 0.47                      | 0.00                      | 654.87                     |
| P34R  | 6.00E-05                  | 8.900E-03                 | 0.20                      | 0.00                      | 567.08                     |
| T58I  | 1.30E-04                  | 5.400E-03                 | 0.50                      | 6.84                      | 32.98                      |
| G60R  | 4.00E-05                  | 7.000E-04                 | 0.00                      | 0.00                      | 270.49                     |
| E153V | 5.00E-05                  | 4.400E-03                 | 0.67                      | 6.76                      | 14.00                      |
| F156L | 1.90E-03                  | 7.900E-03                 | 9.93                      | 0.25                      | 118.64                     |

**Supplementary Table S4.** Rate constants of the network model to simulate Ras WT and missense mutations. Rate constants are based on Gremer *et al*, 2011 (Human Mutation 32, 33-43) See also Supplementary table S5 and Methods.
