# Supplementary material for: Structure‐energy‐based predictions and network modelling of RASopathy and cancer missense mutations
Source: PubMed Central journal article supplement (PMC4188041; doi:10.1002/msb.20145092), 2014-05-06
Supplement: MSB-10-5-727-s17.pdf [file MSB-10-5-727-s17.pdf]

|       | $k_{\text{GDP}}^{\text{exch. intr.}}$<br>[s <sup>-1</sup> ] | $k_{\text{GTP}}^{\text{hydr.intr.}}$<br>[s <sup>-1</sup> ] | $k_{\text{obs}}^{\text{GEF}}$<br>[s <sup>-1</sup> ] | $k_{\text{obs}}^{\text{GAP}}$<br>[s <sup>-1</sup> ] | Kd (RAS-RAF1)<br>[μM] |
|-------|-------------------------------------------------------------|------------------------------------------------------------|-----------------------------------------------------|-----------------------------------------------------|-----------------------|
| WT    | 3.00E-05                                                    | 9.30E-03                                                   | 0.09                                                | 9.3                                                 | 0.22                  |
| G12V  | 2.00E-05                                                    | 1.50E-03                                                   | 0.05                                                | 0.0                                                 | 1.18                  |
| K5N   | 4.00E-05                                                    | 9.40E-03                                                   | 0.11                                                | 10.3                                                | 0.16                  |
| V14I  | 8.90E-04                                                    | 1.00E-02                                                   | 1.77                                                | 10.8                                                | 1.36                  |
| Q22E  | 7.80E-04                                                    | 1.03E-02                                                   | 2.1                                                 | 0.3                                                 | 1.41                  |
| Q22R  | 4.00E-05                                                    | 6.40E-03                                                   | 0.2                                                 | 0.4                                                 | 0.51                  |
| P34L  | 8.00E-05                                                    | 9.20E-03                                                   | 0.14                                                | 0.0                                                 | 27.6                  |
| P34R  | 6.00E-05                                                    | 8.90E-03                                                   | 0.06                                                | 0.0                                                 | 23.9                  |
| T58I  | 1.30E-04                                                    | 5.40E-03                                                   | 0.15                                                | 8.2                                                 | 1.39                  |
| G60R  | 4.00E-05                                                    | 7.00E-04                                                   | 0.0                                                 | 0.0                                                 | 11.4                  |
| E153V | 5.00E-05                                                    | 4.40E-03                                                   | 0.2                                                 | 8.1                                                 | 0.59                  |
| F156L | 1.90E-03                                                    | 7.90E-03                                                   | 2.98                                                | 0.3                                                 | 5.0                   |

**Supplementary Table S5.** Experimental rate constants for Ras RASopathy and cancer mutations. Experimental rate constants based on Gremer et al. 2011, Human Mutation 32, 33-43.  $k_{\text{GDP}}^{\text{exch. intr.}}$  corresponds to the intrinsic GDP dissociation.  $k_{\text{GTP}}^{\text{hydr.intr.}}$  corresponds to the intrinsic GTP hydrolysis.  $k_{\text{obs}}^{\text{GEF}}$  corresponds to the GEF catalyzed GDP dissociation.  $k_{\text{obs}}^{\text{GAP}}$  corresponds to the GAP catalyzed GTP hydrolysis. Kd (RAS-RAF1) corresponds to the affinity between Ras and effector protein.
