# Supplementary material for: Structure‐energy‐based predictions and network modelling of RASopathy and cancer missense mutations
Source: PubMed Central journal article supplement (PMC4188041; doi:10.1002/msb.20145092), 2014-05-06
Supplement: MSB-10-5-727-s18.pdf [file MSB-10-5-727-s18.pdf]

| Species  | Initial concentration [mol l <sup>-1</sup> ] |
|----------|----------------------------------------------|
| RasD     | 6.1e-05                                      |
| RasT     | 0                                            |
| GEF      | 2.56e-5                                      |
| RasD-GEF | 0                                            |
| GAP      | 3.93e-05                                     |
| RasT_GAP | 0                                            |
| EFF      | 3.27e-05                                     |
| RasT_EFF | 0                                            |

**Supplementary Table S6.** Initial concentrations of the network model to simulate Ras WT and missense mutations. See also Methods.
