# Supplementary material for: Structure‐energy‐based predictions and network modelling of RASopathy and cancer missense mutations
Source: Mol Syst Biol. 2014 May 6;10(5):727. doi: 10.1002/msb.20145092 (PMC4188041; doi:10.1002/msb.20145092)
Supplement: Supplementary file 1 — Supplementary Figure S1 [file MSB-10-5-727-s1.pdf]

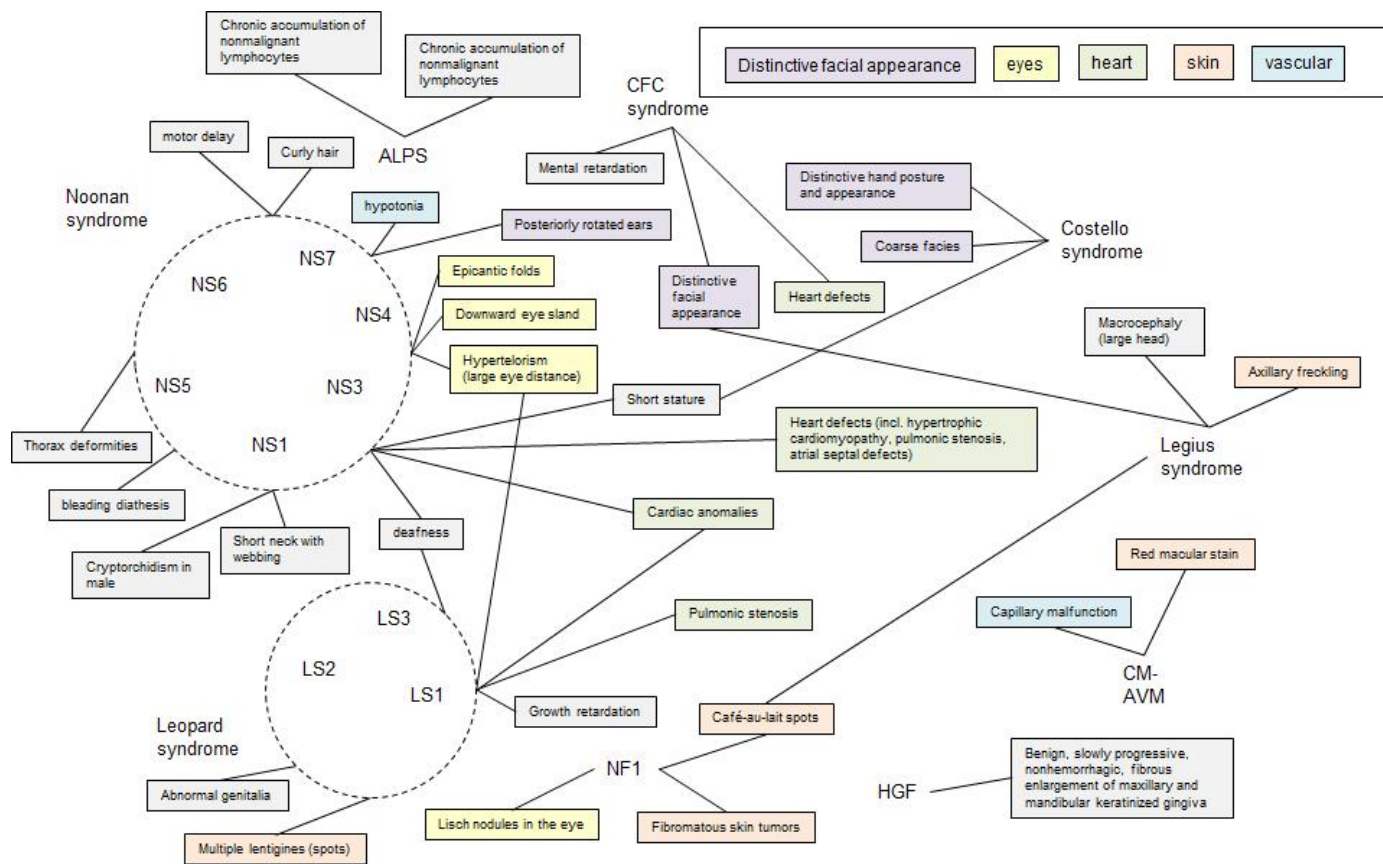

**Supplementary Figure S1.** Disease symptoms of RASopathies. The information on disease symptoms was extracted from the OMIM database. Symptoms were roughly classified according to the region in the body that is affected. Abbreviations: NS, Noonan syndrome; NF1, neurofibromatosis type 1; CFC, cardiofaciocutaneous; LS, LEOPARD syndrome; HGF, hereditary gingival fibromatosis; CM-AVM, capillary malfunction - arteriovenous malfunction; ALPS, autoimmune lymphoproliferative syndrome.
